# Supplementary material
Source: PubMed Central journal article supplement (PMC1899329)
Supplement: ajrcmb_36_4_427__1.pdf [file ajrcmb_36_4_427__1.pdf]

# **NPAS1 Regulates Branching Morphogenesis in Embryonic Lung**

Bernadette M. Levesque, MD, Shutang Zhou, PhD, Lin Shan, MD, PhD, Pamela Johnston, Yanping Kong, MD, PhD, Simone Degan, PhD, and Mary E. Sunday, MD, PhD

Department of Pediatrics, and Department of Pathology, Children's Hospital and Harvard Medical School, Boston, Massachusetts; and Department of Pathology, Duke University Medical Center, Durham, North Carolina

**ONLINE DATA SUPPLEMENT**

**Table E1. Sequences of Oligonucleotide Primers and Probes Used for Real-Time QRT-PCR**

| <b>Gene</b>    | <b>Forward primer</b>             | <b>Reverse primer</b>                | <b>Probe (5'-FAM/3'-TAMRA)</b>        |
|----------------|-----------------------------------|--------------------------------------|---------------------------------------|
| <b>NPAS1</b>   | 5'-tggtggacacccctgagatt-3'        | 5'-ggacttcatgctggacaaagaa-3'         | 5'-aagccagccccaccgaggcat-3'           |
| <b>ARNT</b>    | 5'-cagtcttccatgaggatgtgcat-<br>3' | 5'-acaggggtccacggagctagtagtac-<br>3' | 5'-acgaaggctggtcatctgcccgcacat-3'     |
| <b>SIM2</b>    | 5'-gtgcatggctgtgacacctt-3'        | 5'-acagcagccggtagtagtttgg-3'         | 5'-ccgatatgcacaccacctctgtgctgg-<br>3' |
| <b>b-actin</b> | 5'-aggatcactattggcaacga-<br>3'    | 5'-aggattccataccaagaaggaa-<br>3'     | 5'-tccgatgcctgaggctctttcc-3'          |

**Table E2. Sequences of Oligonucleotide Primers Used for Validation QRT-PCR**

**Using Taqman Primer/Probe**

|                                                                          | <b>Primer</b> | <b>Sequence</b>          | <b>Start</b> | <b>Stop</b> | <b>Tm</b> |
|--------------------------------------------------------------------------|---------------|--------------------------|--------------|-------------|-----------|
| <b>Claudin 11 (NM_008770)</b>                                            | Forward       | CATGGCCACTGGTCTCTACCA    | 330          | 350         | 60        |
|                                                                          | Reverse       | GGCTCTACAAGCCTGCACGTA    | 408          | 388         | 59        |
| <b>TGF-beta induced 68 kDa (NM_9369)</b>                                 | Forward       | AAGCTGGCCTCGATACTCATCT   | 1235         | 1256        | 58        |
|                                                                          | Reverse       | GGGACACCATCTTTGAACACAGA  | 1319         | 1297        | 60        |
| <b>Myocardin (transcript variant A: NM_145136, variant B: NM_146386)</b> | Forward       | CAATTGGATAGTGCCAAGACTGAA | 442          | 465         | 59        |
|                                                                          | Reverse       | GAGGCTTGGAGAATGTGCATAGT  | 539          | 517         | 58        |
| <b>RBPsh (NM_009035)</b>                                                 | Forward       | CTATGGCAACAGCGATGACATT   | 521          | 542         | 59        |
|                                                                          | Reverse       | GACTGCTTCTTTTTGGAGGGTTT  | 601          | 579         | 59        |
| <b>transducin-like enhancer of split 1 (NM_011599)</b>                   | Forward       | ACCCTTCTTCTCCACATGCAA    | 1615         | 1635        | 58        |
|                                                                          | Reverse       | GCAGACGGTTTTTGCAATTCC    | 1683         | 1662        | 59        |
| <b>Npas1 (NM_008718)</b>                                                 | Forward       | TGGTGGACACCCCTGAGATT     | 731          | 750         | 59        |
|                                                                          | Reverse       | GGACTTCATGCGGACAAAGAA    | 822          | 802         | 58        |
| <b>Beta-actin (NM_007393)</b>                                            | Forward       | AGGTCATCACTATTGGCAACGA   | 737          | 758         | 59        |
|                                                                          | Reverse       | AGGATTCCATACCCAAGAAGGAA  | 814          | 792         | 58        |

**TABLE E3****GENES DOWN-REGULATED BY NPAS1-ANTISENSE**

| <b>Accession #</b> | <b>LOG(FC)</b> | <b>FC</b>   | <b>T test</b> | <b>ID</b>                                               |
|--------------------|----------------|-------------|---------------|---------------------------------------------------------|
| 1415871_at         | 0.555807703    | 3.595900807 | 0.017077292   | TGF beta-induced 68 kDa                                 |
| 1416003_at         | 0.560230913    | 3.632711538 | 0.001909861   | claudin 11                                              |
| 1416173_at         | 0.72561732     | 5.316395971 | 0.045941624   | pescadillo homolog 1                                    |
| 1416200_at         | 0.675478094    | 4.736724154 | 0.016833455   | RIKEN                                                   |
| 1416290_a_at       | 0.715190028    | 5.190270926 | 0.023816238   | proteasome, 26S subunit, ATPase, 4                      |
| 1416295_a_at       | 0.706192489    | 5.083847198 | 0.000547142   | IL-2R gamma chain                                       |
| 1416319_at         | 0.823833703    | 6.665514888 | 0.037253303   | ESTs                                                    |
| 1416454_s_at       | 0.749168946    | 5.61266273  | 0.018498288   | actin, alpha 2, smooth muscle, aorta                    |
| 1416652_at         | 0.651771334    | 4.485091776 | 0.0463564     | asporin precursor                                       |
| 1416779_at         | 0.839399081    | 6.908743685 | 0.048441006   | serum deprivation response                              |
| 1416919_a_at       | 0.789537602    | 6.159388565 | 0.043925623   | nephronophtisiss 1 (juvenile)                           |
| 1417012_at         | 0.647369305    | 4.439860296 | 0.044565055   | syndecan 2                                              |
| 1417143_at         | 0.882145658    | 7.623346467 | 0.021520591   | endothelial differentiation, G protein-coupled receptor |
| 1417396_at         | 0.771231925    | 5.905163479 | 0.01487454    | podocalyxin-like                                        |
| 1417862_at         | 0.562131792    | 3.648646528 | 0.034681551   | unknown                                                 |
| 1417963_at         | 0.640779764    | 4.373002891 | 0.035305854   | phospholipid transfer protein                           |
| 1418088_a_at       | 0.799721879    | 6.305534105 | 0.019106652   | syntaxin 8                                              |
| 1418095_at         | 0.421017277    | 2.636436266 | 0.005111278   | small muscle protein, X-linked                          |
| 1418114_at         | 0.716505654    | 5.206017869 | 0.04723583    | RBPsh                                                   |
| 1418503_at         | 0.82364835     | 6.662670715 | 0.036862      | Hspa9a                                                  |
| 1418783_at         | 0.745802559    | 5.569324958 | 0.024439104   | MTR1                                                    |
| 1418887_a_at       | 0.818296779    | 6.581074074 | 0.037340093   | chromosome 11, ESTs                                     |
| 1419467_at         | 0.693185093    | 4.933840357 | 0.012471336   | RIKEN                                                   |
| 1419486_at         | 0.793194352    | 6.211469421 | 0.021489003   | Foxc1                                                   |
| 1419912_s_at       | 0.842443824    | 6.957349561 | 0.037001738   | ESTs                                                    |
| 1420340_at         | 0.737206057    | 5.46016865  | 0.047384454   | RIKEN                                                   |
| 1420903_at         | 0.820976599    | 6.621808221 | 0.029423856   | sialyltransferase 7                                     |
| 1420982_at         | 0.736161795    | 5.44705543  | 0.014412076   | Caper-pending                                           |
| 1420993_at         | 0.679389724    | 4.779579877 | 0.038197888   | B3Gnt5                                                  |
| 1421209_s_at       | 0.79990965     | 6.308260943 | 0.036657558   | inhibitor of kappaB kinase gamma                        |
| 1421383_at         | 0.723586741    | 5.291596748 | 0.01274649    | RIKEN                                                   |
| 1421426_at         | 0.588189352    | 3.874265261 | 0.038936711   | hedgehog-interacting protein                            |
| 1421825_at         | 0.727987146    | 5.345485379 | 0.01205894    | beta site APP cleaving enzyme                           |
| 1421960_at         | 0.648847963    | 4.455002608 | 0.000830201   | adenylate cyclase 3                                     |
| 1422208_a_at       | 0.825649601    | 6.693443491 | 0.017752072   | guanine nucleotide binding protein, beta 5              |
| 1422268_a_at       | 0.701503884    | 5.02925764  | 0.01022198    | ribosomal protein S6 kinase, 70kD, polypeptide 2        |
| 1422340_a_at       | 0.591460078    | 3.903552978 | 0.012172558   | actin, gamma 2, smooth muscle, enteric                  |
| 1422472_at         | 0.707343024    | 5.097333204 | 0.041471559   | peroxisomal biogenesis factor 13                        |
| 1422639_at         | 0.559949395    | 3.630357507 | 0.037493614   | calcitonin-related polypeptide beta                     |
| 1422640_at         | 0.709830808    | 5.126616225 | 0.018736917   | protocadherin beta 9                                    |
| 1422717_at         | 0.755026499    | 5.688876409 | 0.032567263   | acid phosphatase 1, soluble                             |

|              |             |             |             |                                                                     |
|--------------|-------------|-------------|-------------|---------------------------------------------------------------------|
| 1422885_at   | 0.73002863  | 5.370672006 | 0.024996341 | small nuclear ribonucleoprotein SM D3 (SNRNP core protein D3_       |
| 1423032_at   | 0.758258453 | 5.731370091 | 0.013032017 | RIKEN                                                               |
| 1423047_at   | 0.829071118 | 6.746384939 | 0.028037924 | Toll-interacting protein                                            |
| 1423068_at   | 0.721569446 | 5.267074318 | 0.013019361 | selective LIM binding factor                                        |
| 1423280_at   | 0.816473658 | 6.553505343 | 0.01121385  | superior cervical ganglia, neural specific 10                       |
| 1423306_at   | 0.845523467 | 7.006860428 | 0.030229269 | EST                                                                 |
| 1423503_at   | 0.812692469 | 6.496694864 | 0.014378471 | junction CAM 3                                                      |
| 1423505_at   | 0.441889685 | 2.766238907 | 0.002011854 | transgelin                                                          |
| 1423537_at   | 0.768492079 | 5.868026668 | 0.002843886 | brain abundant, membrane attached signal protein 2 (Basp2)          |
| 1423851_a_at | 0.714759768 | 5.185131415 | 0.00845283  | unknown                                                             |
| 1424044_at   | 0.786571228 | 6.117461257 | 0.030463987 | unknown                                                             |
| 1424077_at   | 0.811368511 | 6.476919676 | 0.010029557 | unknown                                                             |
| 1424140_at   | 0.833531493 | 6.816029994 | 0.02577673  | unknown                                                             |
| 1424193_at   | 0.818228592 | 6.580040884 | 0.042418008 | unknown                                                             |
| 1424375_s_at | 0.723643236 | 5.292285143 | 0.025152772 | unknown                                                             |
| 1424481_s_at | 0.769132298 | 5.876683451 | 0.024939623 | unknown                                                             |
| 1424579_at   | 0.671158037 | 4.689840113 | 0.040311754 | similar to solute carrier family 35                                 |
| 1425028_a_at | 0.708218634 | 5.107620644 | 0.031187429 | tropomyosin 2, beta                                                 |
| 1425508_s_at | 0.81005802  | 6.45740491  | 0.02234907  | ADP-ribosylation factor related protein 1                           |
| 1425519_a_at | 0.635265205 | 4.317826676 | 0.014155794 | unknown                                                             |
| 1425551_at   | 0.614520165 | 4.116424597 | 0.031778902 | huntingtin interacting protein 1 related                            |
| 1425605_a_at | 0.763451033 | 5.8003077   | 0.014563837 | LMBR1 long form                                                     |
| 1425694_at   | 0.733878721 | 5.418495548 | 0.042437427 | Tbx5 (t-box transcription factor)                                   |
| 1425934_a_at | 0.784709757 | 6.091296749 | 0.024506113 | beta-1,4-galactosyltransferase 4                                    |
| 1425978_at   | 0.670321701 | 4.680817419 | 0.041677336 | myocardin                                                           |
| 1426236_a_at | 0.804359278 | 6.37322539  | 0.006427183 | glutamine synthetase                                                |
| 1426613_a_at | 0.79397211  | 6.222603231 | 0.037239534 | U2 small nuclear ribonucleoprotein B                                |
| 1426933_at   | 0.828971514 | 6.744837865 | 0.033277662 | RIKEN                                                               |
| 1427050_at   | 0.761737866 | 5.77747222  | 0.032225222 | unknown                                                             |
| 1427109_at   | 0.705932947 | 5.080809909 | 0.046347806 | glutamate receptor, ionotropic, NMD3B (Grin 3b)                     |
| 1427239_at   | 0.82877647  | 6.741809393 | 0.034416582 | WD repeat domain 10                                                 |
| 1427325_s_at | 0.745704276 | 5.568064735 | 0.017918668 | unknown                                                             |
| 1427541_x_at | 0.80997548  | 6.456177762 | 0.035381293 | RHAMM                                                               |
| 1427940_s_at | 0.768445293 | 5.867394554 | 0.035157841 | c-myc binding protein                                               |
| 1428074_at   | 0.638126734 | 4.346370393 | 0.021021061 | RIKEN                                                               |
| 1428191_s_at | 0.843592761 | 6.975779764 | 0.03355135  | RIKEN                                                               |
| 1428390_at   | 0.824617765 | 6.67755948  | 0.042539426 | RIKEN                                                               |
| 1428452_at   | 0.832288025 | 6.796542315 | 0.017317575 | 60S ribosomal protein L37A                                          |
| 1429126_at   | 0.79914494  | 6.297163079 | 0.04033797  | RIKEN                                                               |
| 1429583_at   | 0.481785835 | 3.03239544  | 0.002634741 | Purkinje cell protein L2                                            |
| 1430092_at   | 0.550693571 | 3.553804809 | 0.003857339 | synaptojanin 2                                                      |
| 1431059_x_at | 0.764771822 | 5.817974621 | 0.026322907 | homolog to HIV-1 transcriptional elongation factor TAT cofactor SF1 |
| 1431938_a_at | 0.805376022 | 6.388163479 | 0.025519005 | phosphomannomutase 2                                                |
| 1432097_a_at | 0.702874692 | 5.045157075 | 0.019428151 | DNA cross-link repair protein                                       |

|              |             |             |             |                                                    |
|--------------|-------------|-------------|-------------|----------------------------------------------------|
| 1432130_a_at | 0.665624337 | 4.630462133 | 0.038317736 | RIKEN                                              |
| 1432426_a_at | 0.669392305 | 4.670811116 | 0.00263827  | ubiquitin conjugating enzyme E2                    |
| 1433471_at   | 0.739381492 | 5.487587933 | 0.020671276 | ESTs                                               |
| 1434033_at   | 0.812080918 | 6.487552992 | 0.03210405  | transducin-like enhancer of split                  |
| 1434190_at   | 0.722468827 | 5.277993206 | 0.045881499 | EST                                                |
| 1434575_at   | 0.757252708 | 5.718112658 | 0.001776588 | ubiquitin conjugating enzyme E2                    |
| 1434709_at   | 0.736343025 | 5.44932895  | 0.045520165 | unknown                                            |
| 1434901_at   | 0.89035024  | 7.768733801 | 0.049057408 | ESTs                                               |
| 1435026_at   | 0.706430374 | 5.086632645 | 0.031195058 | ESTs                                               |
| 1435089_at   | 0.725530368 | 5.315331662 | 0.03926095  | unknown                                            |
| 1435113_x_at | 0.7239592   | 5.296136866 | 0.037465965 | Scgn10-like protein                                |
| 1435170_at   | 0.738447441 | 5.475798277 | 0.017343172 | faciogeneital dysplasia homolog                    |
| 1435565_at   | 0.717128376 | 5.213487978 | 0.027965013 | phosphorylase kinase alpha 1                       |
| 1435578_s_at | 0.654399586 | 4.512316827 | 0.042949714 | inhibitor of DNA binding 4                         |
| 1435714_x_at | 0.768710274 | 5.870975574 | 0.018828861 | ESTs                                               |
| 1435966_x_at | 0.714600746 | 5.183233167 | 0.033070791 | mitochondrial ribosomal protein L13                |
| 1436522_at   | 0.780968264 | 6.039044979 | 0.03089664  | RIKEN                                              |
| 1436935_x_at | 0.891026265 | 7.780836061 | 0.029183884 | Chloride channel, nucleotide-sensitive, 1A         |
| 1437043_a_at | 0.774043584 | 5.943518018 | 0.044510303 | RIKEN                                              |
| 1437463_x_at | 0.619276045 | 4.161750546 | 0.004880004 | TGF beta-induced 68 kDa                            |
| 1437592_x_at | 0.806229097 | 6.40072395  | 0.004335092 | RIKEN                                              |
| 1437801_at   | 0.772266246 | 5.91924405  | 0.021086763 | testis expressed gene 189                          |
| 1438083_at   | 0.61706441  | 4.140610794 | 0.006887336 | hedgehog-interacting protein                       |
| 1438202_at   | 0.76745039  | 5.853968617 | 0.016034807 | RIKEN                                              |
| 1438312_s_at | 0.781079429 | 6.040590975 | 0.026220178 | N-terminal kinase-like                             |
| 1438441_at   | 0.642386584 | 4.389212269 | 0.005853115 | inhibitor of DN binding 4                          |
| 1438560_x_at | 0.854208767 | 7.148398697 | 0.041425249 | chaperonin subunit 4 (delta)                       |
| 1438769_a_at | 0.865527728 | 7.337155571 | 0.048551626 | unknown                                            |
| 1439381_x_at | 0.718864053 | 5.2343656   | 0.041911054 | EST                                                |
| 1441866_s_at | 0.814855463 | 6.529132207 | 0.039026577 | EST                                                |
| 1448123_s_at | 0.583133994 | 3.829428755 | 0.006227538 | TGF beta-induced 68 kDa                            |
| 1448136_at   | 0.744862555 | 5.557283538 | 0.031673731 | ectonucleotide pyrophosphatase phosphodiesterase 2 |
| 1448308_at   | 0.80905779  | 6.442549883 | 0.047045334 | AP-3, mu-1                                         |
| 1448325_at   | 0.759570307 | 5.748708759 | 0.014026837 | myeloid differentiation primary response gene 116  |
| 1448490_at   | 0.687442064 | 4.869025668 | 0.025149797 | RIKEN                                              |
| 1448545_at   | 0.705106228 | 5.071147324 | 0.002374699 | syndecan 2                                         |
| 1448843_at   | 0.652169852 | 4.489209282 | 0.01229729  | RIKEN                                              |
| 1448965_at   | 0.756304223 | 5.705638119 | 0.039972136 | RIKEN                                              |
| 1449062_at   | 0.80027705  | 6.313599803 | 0.040688118 | ketoheokinase                                      |
| 1449336_a_at | 0.758926127 | 5.740188143 | 0.027347918 | serine threonine kinase 2                          |
| 1449629_s_at | 0.78840166  | 6.143299097 | 0.019449705 | EST                                                |
| 1449823_at   | 0.708795617 | 5.114410903 | 0.024235497 | dachshund 2                                        |
| 1449910_at   | 0.765736374 | 5.830910481 | 0.049519917 | RIKEN                                              |
| 1450408_at   | 0.82410407  | 6.669665754 | 0.038458448 | chloride channel 7                                 |
| 1450496_a_at | 0.77099125  | 5.901891892 | 0.012551522 | RIKEN                                              |
| 1450510_a_at | 0.604608931 | 4.023545628 | 0.035538568 | Cacana 1a (CaV2.1)                                 |
| 1451170_s_at | 0.843151804 | 6.968700571 | 0.034759202 | similar to pM5 protein                             |
| 1451213_at   | 0.706895516 | 5.092083494 | 0.047451799 | peroxisomal biogenesis factor 11b                  |

|              |             |             |             |                                                      |
|--------------|-------------|-------------|-------------|------------------------------------------------------|
| 1451552_at   | 0.604299173 | 4.02067688  | 0.009695562 | similar to lipoyltransferase                         |
| 1451646_at   | 0.660259586 | 4.573614816 | 0.020473519 | similar to cdc2 (P34 protein kinase)                 |
| 1451782_a_at | 0.736746278 | 5.454391129 | 0.0226129   | nucleoside transporter ENT1b                         |
| 1451790_a_at | 0.827184038 | 6.717134398 | 0.041388237 | tissue factor pathway inhibitor (TFPI)               |
| 1451857_a_at | 0.761555799 | 5.775050665 | 0.045711411 | unknown                                              |
| 1451867_x_at | 0.761784077 | 5.778087005 | 0.029621727 | rho GTPase-activating protein 6 isoform 2 (rhgap6)   |
| 1451998_at   | 0.619264448 | 4.161639413 | 0.000978413 | chromosome 20 ORF                                    |
| 1452074_at   | 0.672987731 | 4.70964021  | 0.043997764 | RIKEN                                                |
| 1452083_a_at | 0.715583198 | 5.19497184  | 0.037516171 | praja 1                                              |
| 1452240_at   | 0.787178365 | 6.126019362 | 0.039072771 | Bruno-like 4, RNA-binding protein                    |
| 1452411_at   | 0.76713032  | 5.849655899 | 0.040510182 | unknown                                              |
| 1452459_at   | 0.704691875 | 5.066311337 | 0.017084991 | unknown                                              |
| 1452668_x_at | 0.791642732 | 6.189317072 | 0.011545147 | rab-2                                                |
| 1452670_at   | 0.669922669 | 4.676518632 | 0.038223952 | transient receptor protein 2                         |
| 1454712_at   | 0.857099501 | 7.196138287 | 0.043488865 | fibrosin                                             |
| 1454947_a_at | 0.774329765 | 5.947435827 | 0.029538142 | unknown                                              |
| 1455710_x_at | 0.779566601 | 6.019577502 | 0.030959074 | mature T cell proliferation-1                        |
| 1455898_x_at | 0.713068777 | 5.16498158  | 0.011043189 | EST                                                  |
| 1455991_at   | 0.856342664 | 7.183608637 | 0.046469215 | ESTs                                                 |
| 1456250_x_at | 0.624178932 | 4.209000062 | 0.003621908 | TGF beta-induced 68 kDa                              |
| 1456325_at   | 0.73872303  | 5.47927415  | 0.041257032 | unknown                                              |
| 1456572_x_at | 0.57578553  | 3.765178156 | 0.030187583 | chaperonin subunit 4 (delta)                         |
| 1456736_x_at | 0.822858362 | 6.650562243 | 0.034200775 | RIKEN                                                |
| 1460181_at   | 0.788626115 | 6.14647493  | 0.032860255 | Scgn10-like protein                                  |
| 1460276_a_at | 0.781058005 | 6.040292991 | 0.04101277  | transmembrane domain protein regulated in adipocytes |
| 1460343_at   | 0.849906598 | 7.077935449 | 0.023221103 | neuralized                                           |
| 1460379_at   | 0.773264467 | 5.932865012 | 0.006789992 | HoxB4                                                |

#### **GENES UP-REGULATED BY NPAS1-ANTISENSE**

|              |             |             |             |                                                        |
|--------------|-------------|-------------|-------------|--------------------------------------------------------|
| 1417882_at   | 1.239957855 | 17.37632196 | 0.01488677  | ESTs                                                   |
| 1418265_s_at | 1.339727264 | 21.86388145 | 0.034191643 | interferon regulatory factor 2                         |
| 1418838_at   | 1.283748828 | 19.21979838 | 0.043971395 | similar to ATP-binding cassette, subfamily D, member 1 |
| 1428200_a_at | 1.247253027 | 17.67067043 | 0.031808199 | ESTs                                                   |
| 1426225_at   | 1.149523598 | 14.10988904 | 0.019049968 | retinol binding protein                                |
| 1427138_at   | 1.198800785 | 15.80522871 | 0.041430979 | unknown                                                |
| 1431241_at   | 1.620800041 | 41.76380323 | 0.035103541 | RIKEN                                                  |
| 1434751_at   | 1.442172799 | 27.6804279  | 0.041518145 | iduronate 2-sulfatase                                  |
| 1435527_at   | 1.70781472  | 51.02872527 | 0.024468246 | ESTs                                                   |
| 1449419_at   | 1.457037239 | 28.6442357  | 0.047586928 | RIKEN                                                  |
| 1450191_a_at | 1.507769222 | 32.19357612 | 0.01676823  | Sox-13                                                 |

**Table E4: Known Genes Down-Regulated by Npas1 Antisense Treatment**

| <u>Accession</u> |                |             |               |                                                              |
|------------------|----------------|-------------|---------------|--------------------------------------------------------------|
| <u>#</u>         | <u>log(FC)</u> | <u>FC</u>   | <u>t-test</u> | <u>ID</u>                                                    |
| 1428452_at       | 0.832288025    | 6.796542315 | 0.017317575   | 60S ribosomal protein L37A                                   |
| 1422717_at       | 0.755026499    | 5.688876409 | 0.032567263   | acid phosphatase 1, soluble                                  |
| 1416454_s_at     | 0.749168946    | 5.61266273  | 0.018498288   | actin, alpha 2, smooth muscle, aorta                         |
| 1422340_a_at     | 0.591460078    | 3.903552978 | 0.012172558   | actin, gamma 2, smooth muscle, enteric                       |
| 1421960_at       | 0.648847963    | 4.455002608 | 0.000830201   | adenylate cyclase 3                                          |
| 1425508_s_at     | 0.81005802     | 6.45740491  | 0.02234907    | ADP-ribosylation factor related protein 1                    |
| 1448308_at       | 0.80905779     | 6.442549883 | 0.047045334   | AP-3, mu-1                                                   |
| 1416652_at       | 0.651771334    | 4.485091776 | 0.0463564     | asporin precursor                                            |
| 1420993_at       | 0.679389724    | 4.779579877 | 0.038197888   | B3Gnt5                                                       |
| 1421825_at       | 0.727987146    | 5.345485379 | 0.01205894    | beta site APP cleaving enzyme                                |
| 1425934_a_at     | 0.784709757    | 6.091296749 | 0.024506113   | beta-1,4-galactosyltransferase 4                             |
| 1423537_at       | 0.768492079    | 5.868026668 | 0.002843886   | brain abundant, membrane attached signal protein 2 (Basp2)   |
| 1452240_at       | 0.787178365    | 6.126019362 | 0.039072771   | Bruno-like 4, RNA-binding protein                            |
| 1450510_a_at     | 0.604608931    | 4.023545628 | 0.035538568   | Cacana 1a (CaV2.1)                                           |
| 1422639_at       | 0.559949395    | 3.630357507 | 0.037493614   | calcitonin-related polypeptide beta                          |
| 1420982_at       | 0.736161795    | 5.44705543  | 0.014412076   | Caper                                                        |
| 1438560_x_at     | 0.854208767    | 7.148398697 | 0.041425249   | chaperonin subunit 4 (delta)                                 |
| 1450408_at       | 0.82410407     | 6.669665754 | 0.038458448   | chloride channel 7                                           |
| 1436935_x_at     | 0.891026265    | 7.780836061 | 0.029183884   | Chloride channel, nucleotide-sensitive, 1A                   |
| 1416003_at       | 0.560230913    | 3.632711538 | 0.001909861   | claudin 11                                                   |
| 1427940_s_at     | 0.768445293    | 5.867394554 | 0.035157841   | c-myc binding protein                                        |
| 1449823_at       | 0.708795617    | 5.114410903 | 0.024235497   | dachshund 2                                                  |
| 1432097_a_at     | 0.702874692    | 5.045157075 | 0.019428151   | DNA cross-link repair protein                                |
| 1448136_at       | 0.744862555    | 5.557283538 | 0.031673731   | ectonucleotide pyrophosphatasephosphodiesterase 2            |
| 1417143_at       | 0.882145658    | 7.623346467 | 0.021520591   | endothelial differentiation G protein-coupled receptor       |
| 1435170_at       | 0.738447441    | 5.475798277 | 0.017343172   | faciogeneital dysplasia homolog                              |
| 1454712_at       | 0.857099501    | 7.196138287 | 0.043488865   | fibrosin                                                     |
| 1419486_at       | 0.793194352    | 6.211469421 | 0.021489003   | Foxc1                                                        |
| 1427109_at       | 0.705932947    | 5.080809909 | 0.046347806   | glutamate receptor, ionotropic, NMD3B (Grin 3b)              |
| 1426236_a_at     | 0.804359278    | 6.37322539  | 0.006427183   | glutamine synthetase                                         |
| 1422208_a_at     | 0.825649601    | 6.693443491 | 0.017752072   | guanine nucleotide binding protein, beta 5                   |
| 1438083_at       | 0.61706441     | 4.140610794 | 0.006887336   | hedgehog-interacting protein                                 |
| 1431059_x_at     | 0.764771822    | 5.817974621 | 0.026322907   | HIV-1 transcriptional elongation factor TAT cofactor TAT-SF1 |

**Table E4: Known Genes Down-Regulated by Npas1 Antisense Treatment**

| <u>Accession</u> |                |             |               |                                                           |
|------------------|----------------|-------------|---------------|-----------------------------------------------------------|
| <u>#</u>         | <u>log(FC)</u> | <u>FC</u>   | <u>t-test</u> | <u>ID</u>                                                 |
| 1460379_at       | 0.773264467    | 5.932865012 | 0.006789992   | <b>HoxB4</b>                                              |
| 1418503_at       | 0.82364835     | 6.662670715 | 0.036862      | <b>Hspa9a</b>                                             |
| 1425551_at       | 0.614520165    | 4.116424597 | 0.031778902   | <b>huntingtin interacting protein 1 related</b>           |
| 1416295_a_at     | 0.706192489    | 5.083847198 | 0.000547142   | <b>IL-2R gamma chain</b>                                  |
| 1435578_s_at     | 0.654399586    | 4.512316827 | 0.042949714   | <b>inhibitor of DNA binding 4</b>                         |
| 1421209_s_at     | 0.79990965     | 6.308260943 | 0.036657558   | <b>inhibitor of kappaB kinase gamma</b>                   |
| 1423503_at       | 0.812692469    | 6.496694864 | 0.014378471   | <b>junction CAM 3</b>                                     |
| 1449062_at       | 0.80027705     | 6.313599803 | 0.040688118   | <b>ketoheokinase</b>                                      |
| 1425605_a_at     | 0.763451033    | 5.8003077   | 0.014563837   | <b>LMBR1 long form</b>                                    |
| 1455710_x_at     | 0.77956601     | 6.019577502 | 0.030959074   | <b>mature T cell proliferation-1</b>                      |
| 1435966_x_at     | 0.714600746    | 5.183233167 | 0.033070791   | <b>mitochondrial ribosomal protein L13</b>                |
| 1418783_at       | 0.745802559    | 5.569324958 | 0.024439104   | <b>MTR1</b>                                               |
| 1448325_at       | 0.759570307    | 5.748708759 | 0.014026837   | <b>myeloid differentiation primary response gene 116</b>  |
| 1425978_at       | 0.670321701    | 4.680817419 | 0.041677336   | <b>myocardin</b>                                          |
| 1416919_a_at     | 0.789537602    | 6.159388565 | 0.043925623   | <b>nephronophtisiss 1 (juvenile)</b>                      |
| 1460343_at       | 0.849906598    | 7.077935449 | 0.023221103   | <b>neuralized</b>                                         |
| 1438312_s_at     | 0.781079429    | 6.040590975 | 0.026220178   | <b>N-terminal kinase-like</b>                             |
| 1451782_a_at     | 0.736746278    | 5.454391129 | 0.0226129     | <b>nucleoside transporter ENT1b</b>                       |
| 1451213_at       | 0.706895516    | 5.092083494 | 0.047451799   | <b>peroxisomal biogenesis factor 11b</b>                  |
| 1422472_at       | 0.707343024    | 5.097333204 | 0.041471559   | <b>peroxisomal biogenesis factor 13</b>                   |
| 1416173_at       | 0.72561732     | 5.316395971 | 0.045941624   | <b>pescafillo homolog 1</b>                               |
| 1417963_at       | 0.640779764    | 4.373002891 | 0.035305854   | <b>phospholipid transfer protein</b>                      |
| 1431938_a_at     | 0.805376022    | 6.388163479 | 0.025519005   | <b>phosphomannomutase 2</b>                               |
| 1435565_at       | 0.717128376    | 5.213487978 | 0.027965013   | <b>phosphorylase kinase alpha 1</b>                       |
| 1417396_at       | 0.771231925    | 5.905163479 | 0.01487454    | <b>podocalyxin-like</b>                                   |
| 1452083_a_at     | 0.715583198    | 5.19497184  | 0.037516171   | <b>praja 1</b>                                            |
| 1416290_a_at     | 0.715190028    | 5.190270926 | 0.023816238   | <b>proteasome, 26S subunit, ATPase, 4</b>                 |
| 1422640_at       | 0.709830808    | 5.126616225 | 0.018736917   | <b>protocadherin beta 9</b>                               |
| 1429583_at       | 0.481785835    | 3.03239544  | 0.002634741   | <b>Purkinje cell protein L2</b>                           |
| 1452668_x_at     | 0.791642732    | 6.189317072 | 0.011545147   | <b>rab-2</b>                                              |
| 1418114_at       | 0.716505654    | 5.206017869 | 0.04723583    | <b>RBP<sub>suh</sub></b>                                  |
| 1427541_x_at     | 0.80997548     | 6.456177762 | 0.035381293   | <b>RHAMM</b>                                              |
| 1451867_x_at     | 0.761784077    | 5.778087005 | 0.029621727   | <b>rho GTPase-activating protein 6 isoform 2 (rhgap6)</b> |

**Table E4: Known Genes Down-Regulated by Npas1 Antisense Treatment**

| <u>Accession</u> |                |             |               |                                                                      |  |
|------------------|----------------|-------------|---------------|----------------------------------------------------------------------|--|
| <u>#</u>         | <u>log(FC)</u> | <u>FC</u>   | <u>t-test</u> | <u>ID</u>                                                            |  |
| 1422268_a_at     | 0.701503884    | 5.02925764  | 0.01022198    | <b>ribosomal protein S6 kinase, 70kD, polypeptide 2</b>              |  |
| 1460181_at       | 0.788626115    | 6.14647493  | 0.032860255   | <b>Scgn10-like protein</b>                                           |  |
| 1423068_at       | 0.721569446    | 5.267074318 | 0.013019361   | <b>selective LIM binding factor</b>                                  |  |
| 1449336_a_at     | 0.758926127    | 5.740188143 | 0.027347918   | <b>serine threonine kinase 2</b>                                     |  |
| 1416779_at       | 0.839399081    | 6.908743685 | 0.048441006   | <b>serum deprivation response</b>                                    |  |
| 1420903_at       | 0.820976599    | 6.621808221 | 0.029423856   | <b>sialyltransferase 7</b>                                           |  |
| 1451646_at       | 0.660259586    | 4.573614816 | 0.020473519   | <b>similar to cdc2 (P34 protein kinase)</b>                          |  |
| 1451552_at       | 0.604299173    | 4.02067688  | 0.009695562   | <b>similar to lipoyltransferase</b>                                  |  |
| 1451170_s_at     | 0.843151804    | 6.968700571 | 0.034759202   | <b>similar to pM5 protein</b>                                        |  |
| 1424579_at       | 0.671158037    | 4.689840113 | 0.040311754   | <b>similar to solute carrier family 35</b>                           |  |
| 1422885_at       | 0.73002863     | 5.370672006 | 0.024996341   | <b>small nuclear ribonucleoprotein SM D3 (SNRNP core protein D3_</b> |  |
| 1423280_at       | 0.816473658    | 6.553505343 | 0.01121385    | <b>superior cervical ganglia, neural specific 10</b>                 |  |
| 1430092_at       | 0.550693571    | 3.553804809 | 0.003857339   | <b>synaptojanin 2</b>                                                |  |
| 1448545_at       | 0.705106228    | 5.071147324 | 0.002374699   | <b>syndecan 2</b>                                                    |  |
| 1418088_a_at     | 0.799721879    | 6.305534105 | 0.019106652   | <b>syntaxin 8</b>                                                    |  |
| 1425694_at       | 0.733878721    | 5.418495548 | 0.042437427   | <b>Tbx5 (t-box transcription factor)</b>                             |  |
| 1437801_at       | 0.772266246    | 5.91924405  | 0.021086763   | <b>testis expressed gene 189</b>                                     |  |
| 1456250_x_at     | 0.624178932    | 4.209000062 | 0.003621908   | <b>TGF beta-induced 68 kDa</b>                                       |  |
| 1451790_a_at     | 0.827184038    | 6.717134398 | 0.041388237   | <b>tissue factor pathway inhibitor (TFPI)</b>                        |  |
| 1423047_at       | 0.829071118    | 6.746384939 | 0.028037924   | <b>Toll-interacting protein</b>                                      |  |
| 1434033_at       | 0.812080918    | 6.487552992 | 0.03210405    | <b>transducin-like enhancer of split</b>                             |  |
| 1452670_at       | 0.669922669    | 4.676518632 | 0.038223952   | <b>transient receptor protein 2</b>                                  |  |
| 1460276_a_at     | 0.781058005    | 6.040292991 | 0.04101277    | <b>transmembrane domain protein regulated in adipocytes</b>          |  |
| 1425028_a_at     | 0.708218634    | 5.107620644 | 0.031187429   | <b>tropomyosin 2, beta</b>                                           |  |
| 1426613_a_at     | 0.79397211     | 6.222603231 | 0.037239534   | <b>U2 small nuclear ribonucleoprotein B</b>                          |  |
| 1434575_at       | 0.757252708    | 5.718112658 | 0.001776588   | <b>ubiquitin conjugating enzyme E2</b>                               |  |
| 1427239_at       | 0.82877647     | 6.741809393 | 0.034416582   | <b>WD repeat domain 10</b>                                           |  |
